# Supplementary material for: Heterogeneous Nuclear Ribonucleoprotein K Is Involved in the Estrogen-Signaling Pathway in Breast Cancer
Source: PubMed Central journal article supplement (PMC7962001; doi:10.3390/ijms22052581), 2021-03-04
Supplement: ijms-22-02581-s001.pdf [file ijms-22-02581-s001.pdf]

# Supplementary Figures

## Figure S1.

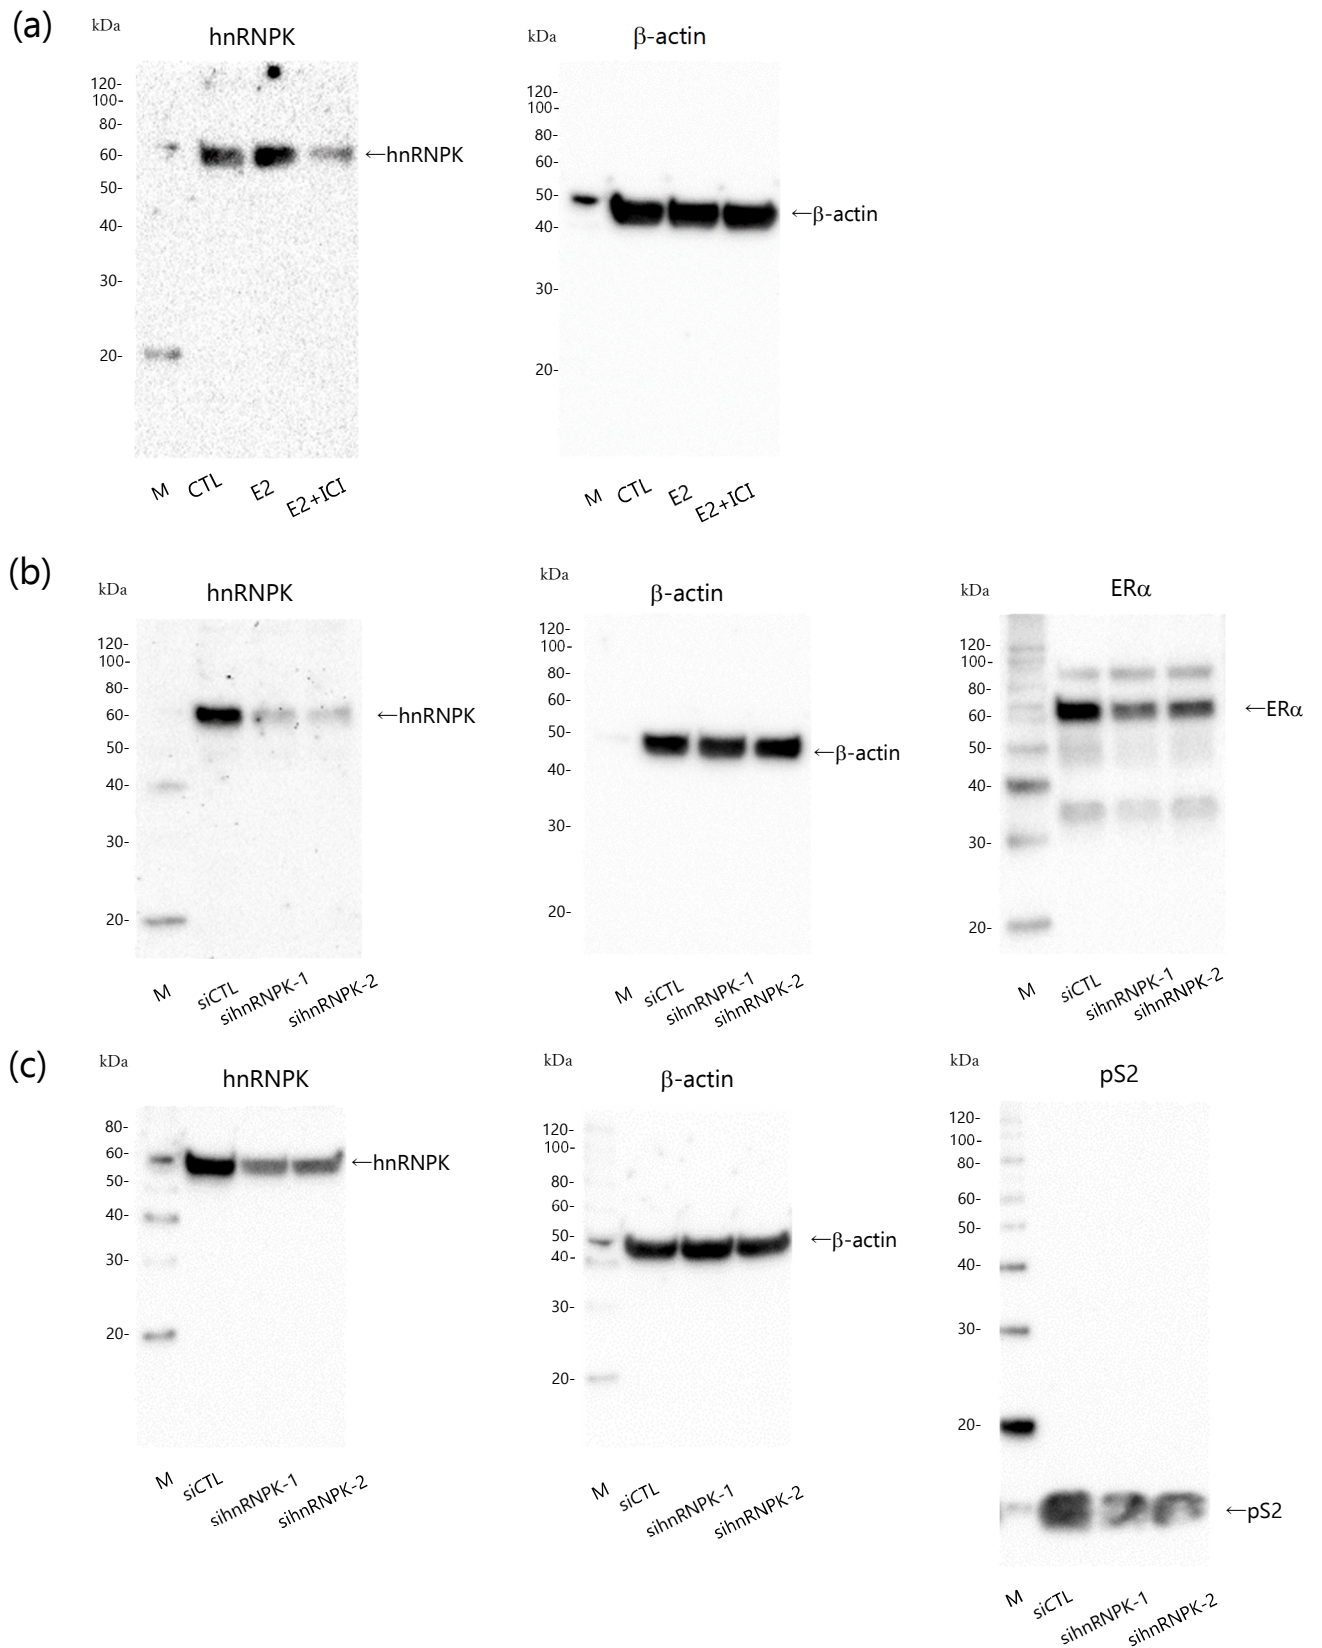

Figure S1. Full-length Western blot images (a) Full-length blot image for figure 1b.

(b) Full-length blot image for figure 2a. (c) Full-length blot image for figure 2c.

M, molecular weight marker.
